# Supplementary material for: Influence of co-ligands and solvents on the packing and photoluminescence of three related MnII metal–organic frameworks
Source: Royal Society of Chemistry journal article supplement (doi:10.1039/b817418k), 2009-01-01
Supplement: b817418k.pdf [file b817418k.pdf]

## Supporting Information

### Influence of co-ligands and solvents on the packing and photoluminescence of three related Mn<sup>II</sup> metal-organic frameworks

*Sujing Wang, Shunshun Xiong, Lexin Song\* and Zhiyong Wang\**

To whom correspondence should be addressed. E-mail: [zwang3@ustc.edu.cn](mailto:zwang3@ustc.edu.cn). Fax: +86-551-3603185; Tel: +86-551-3603185

*Hefei National Laboratory for Physical Science at Microscale, Joint-lab of Green Synthetic Chemistry and Department of Chemistry, University of Science and Technology of China, Hefei 230026, P. R. China*

#### 1. Selected bond lengths and bond angles of compounds 1-3

**Table S1. Selected Bond Lengths (Å) and Bond Angles (deg) for Compound 1 – 3**

| Compound 1 <sup>a</sup> |            |                                      |          |                                      |          |
|-------------------------|------------|--------------------------------------|----------|--------------------------------------|----------|
| Mn1-O1                  | 2.1582(16) | O5-Mn1-O1                            | 94.28(6) | O5-Mn2-O2                            | 86.68(6) |
| Mn1-O3 <sup>A</sup>     | 2.1138(15) | O5-Mn1-O1 <sup>B</sup>               | 85.72(6) | O5-Mn2-O2 <sup>B</sup>               | 93.32(6) |
| Mn1-O5                  | 2.2500(16) | O5-Mn1-O3 <sup>A</sup>               | 93.32(6) | O5-Mn2-O4 <sup>A</sup>               | 88.87(6) |
| Mn2-O2                  | 2.1355(15) | O5-Mn1-O3 <sup>C</sup>               | 87.68(6) | O5-Mn2-O4 <sup>C</sup>               | 91.13(6) |
| Mn2-O4 <sup>A</sup>     | 2.2018(16) | O1-Mn1-O3 <sup>A</sup>               | 92.14(6) | O5 <sup>B</sup> -Mn2-O4 <sup>A</sup> | 91.13(6) |
| Mn2-O5                  | 2.2222(17) | O1-Mn1-O3 <sup>C</sup>               | 87.86(6) | O2-Mn2-O4 <sup>A</sup>               | 97.22(6) |
|                         |            | O1 <sup>B</sup> -Mn1-O3 <sup>C</sup> | 92.14(6) | O2-Mn2-O4 <sup>C</sup>               | 82.78(6) |

| Compound <b>2</b> <sup>b</sup> |            |                                      |           |                                      |           |
|--------------------------------|------------|--------------------------------------|-----------|--------------------------------------|-----------|
| Mn1-O1 <sup>C</sup>            | 2.1736(18) | O1 <sup>C</sup> -Mn1-O4 <sup>A</sup> | 171.96(7) | O3 <sup>D</sup> -Mn1-O2              | 104.98(7) |
| Mn1-O2                         | 2.1264(17) | O3 <sup>D</sup> -Mn1-N1              | 166.12(7) | O3 <sup>D</sup> -Mn1-O5              | 86.79(7)  |
| Mn1-O3 <sup>D</sup>            | 2.1041(17) | O2-Mn1-O5                            | 166.60(7) | O3 <sup>D</sup> -Mn1-O4 <sup>A</sup> | 86.66(7)  |
| Mn1-O4 <sup>A</sup>            | 2.1759(17) | N1-Mn1-O2                            | 86.30(8)  | O2-Mn1-O1 <sup>C</sup>               | 86.69(7)  |
| Mn1-O5                         | 2.2988(18) | N1-Mn1-O1 <sup>C</sup>               | 89.92(7)  | O2-Mn1-O4 <sup>A</sup>               | 97.82(7)  |
| Mn1-N1                         | 2.275(2)   | N1-Mn1-O5                            | 83.04(8)  | O1 <sup>C</sup> -Mn1-O5              | 85.18(7)  |
|                                |            | N1-Mn1-O4 <sup>A</sup>               | 83.76(7)  | O5-Mn1-O4 <sup>A</sup>               | 89.11(7)  |

| Compound <b>3</b> <sup>c</sup> |            |                                      |           |                                      |          |
|--------------------------------|------------|--------------------------------------|-----------|--------------------------------------|----------|
| Mn1-O1 <sup>B</sup>            | 2.2673(16) | O1 <sup>B</sup> -Mn1-O3              | 171.80(7) | O6-Mn1-O1 <sup>B</sup>               | 91.73(8) |
| Mn1-O1 <sup>C</sup>            | 2.2283(17) | O1 <sup>C</sup> -Mn1-O4 <sup>A</sup> | 165.19(7) | O6-Mn1-O1 <sup>C</sup>               | 95.76(8) |
| Mn1-O3                         | 2.0966(17) | O5-Mn1-O6                            | 174.28(6) | O6-Mn1-O3                            | 89.94(8) |
| Mn1-O4 <sup>A</sup>            | 2.1366(18) | O5-Mn1-O1 <sup>B</sup>               | 86.42(6)  | O6-Mn1-O4 <sup>A</sup>               | 87.27(8) |
| Mn1-O5                         | 2.2457(14) | O5-Mn1-O1 <sup>C</sup>               | 89.24(6)  | O1 <sup>C</sup> -Mn1-O3              | 92.10(7) |
| Mn1-O6                         | 2.133(2)   | O5-Mn1-O3                            | 92.65(7)  | O1 <sup>B</sup> -Mn1-O1 <sup>C</sup> | 79.74(6) |
|                                |            | O5-Mn1-O4 <sup>A</sup>               | 87.19(6)  | O1 <sup>B</sup> -Mn1-O4 <sup>A</sup> | 85.68(7) |

<sup>a</sup> Symmetry transformations used to generate equivalent atoms: A)  $-x+1/2, y+1/2, -z+1/2$ ; B)  $-x, -y, -z$ ; C)  $x-1/2, -y-1/2, z-1/2$ . <sup>b</sup> Symmetry transformations used to generate equivalent atoms: A)  $-x+1/2, -y, z+1/2$ ; B)  $-x, -y, -z$ ; C)  $-x-1/2, y-1/2, z$ ; D)  $x, -y-1/2, z-1/2$ . <sup>c</sup> Symmetry transformation used to generate equivalent atoms: A)  $-x+1/2, y, -z$ ; B)  $x+1/2, y+1/2, z+1/2$ ; C)  $-x+1/2, -y+1/2, -z+1/2$ .

## 2. PXRD patterns of compounds 1-3

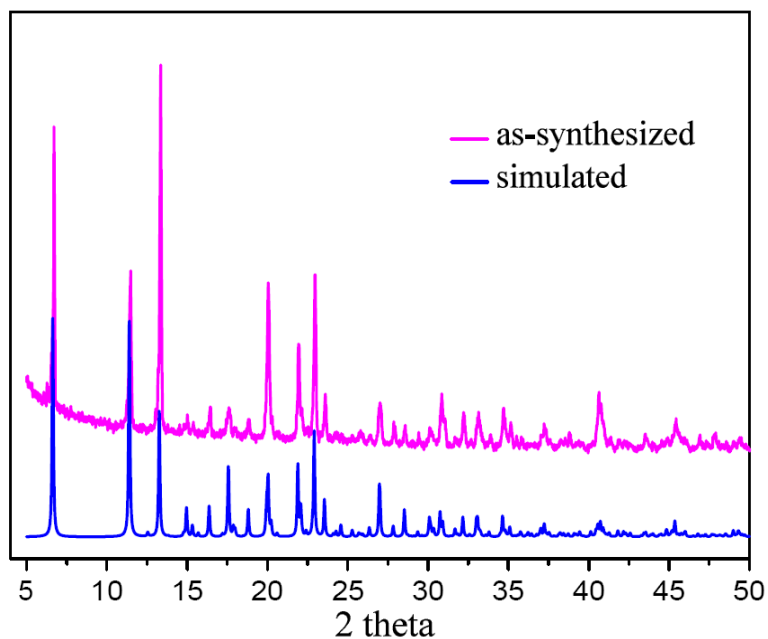

**Figure S1.** Powder X-ray diffraction patterns of as-synthesized (in purple) and simulated from the single-crystal diffraction data (in blue) for compound **1**.

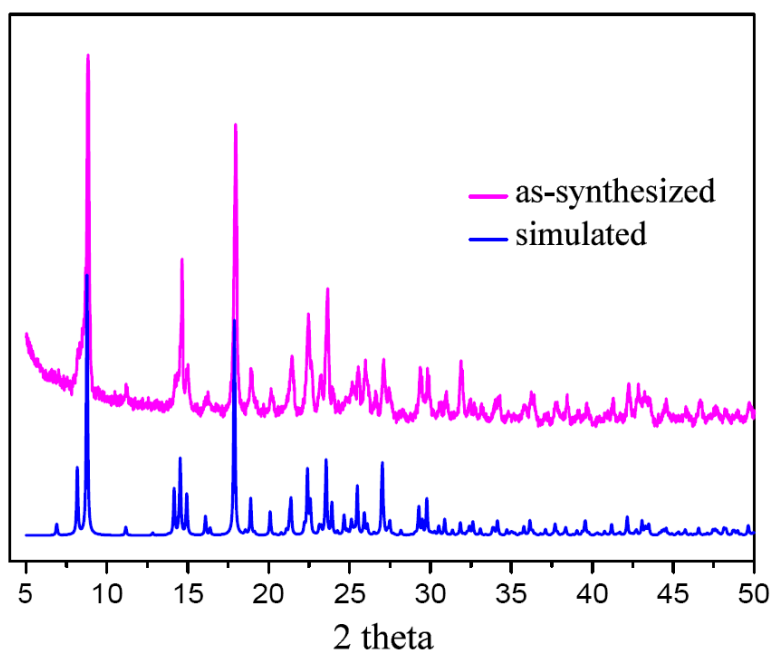

**Figure S2.** Powder X-ray diffraction patterns of as-synthesized (in purple) and simulated from the single-crystal diffraction data (in blue) for compound **2**.

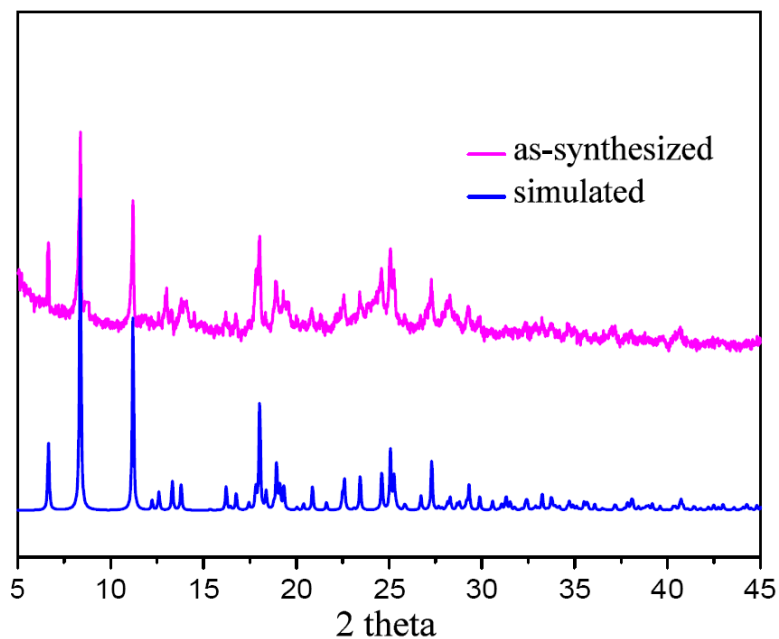

**Figure S3.** Powder X-ray diffraction patterns of as-synthesized (in purple) and simulated from the single-crystal diffraction data (in blue) for compound **3**.

### 3. TGA curves of compounds 1-3

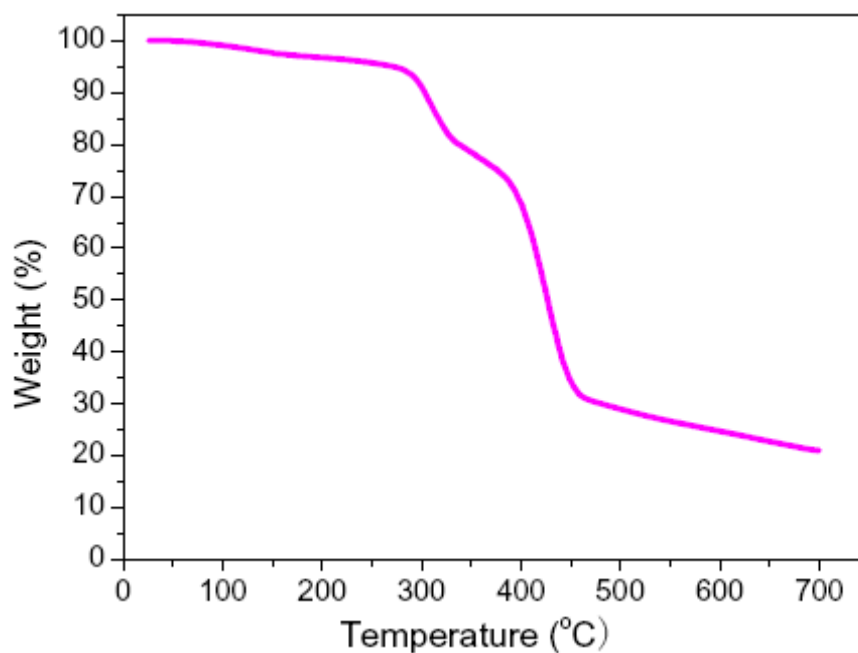

**Figure S4.** Thermal gravimetric analysis (TGA) for Compound **1**.

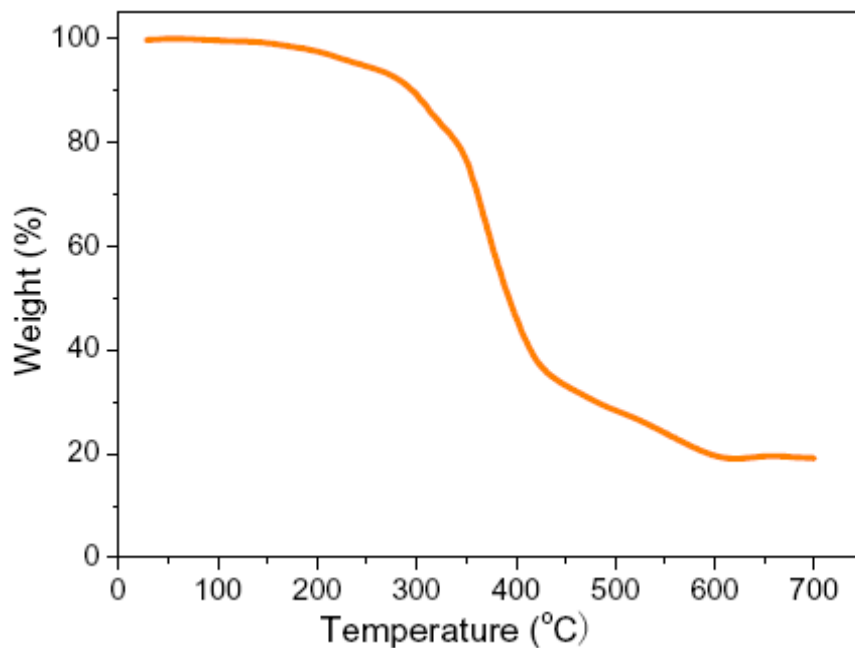

**Figure S5.** Thermal gravimetric analysis (TGA) for Compound 2.

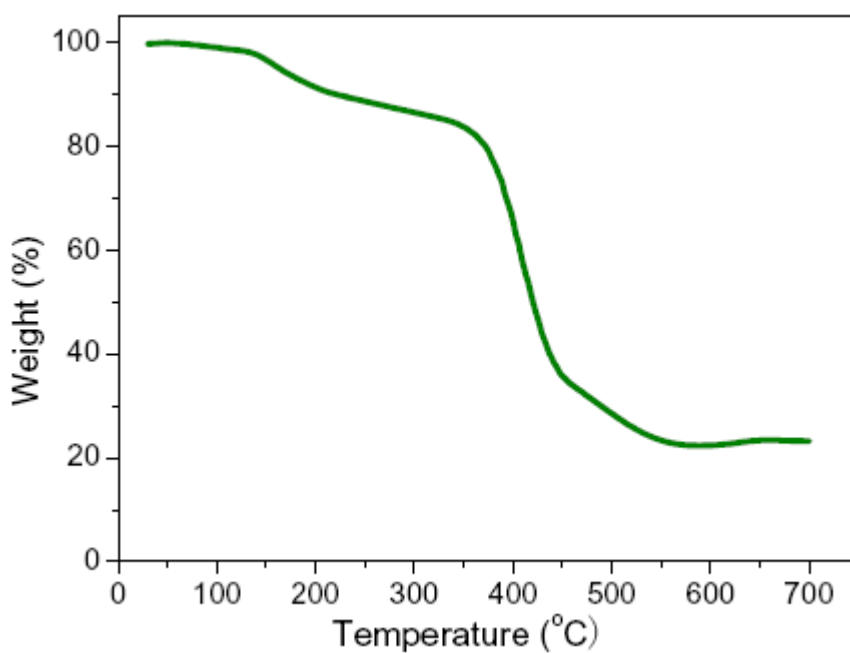

**Figure S6.** Thermal gravimetric analysis (TGA) for Compound 3.

**4. Semilogarithmic emission decay plots of the free H<sub>2</sub>DTDC ligand and compounds 1-3**

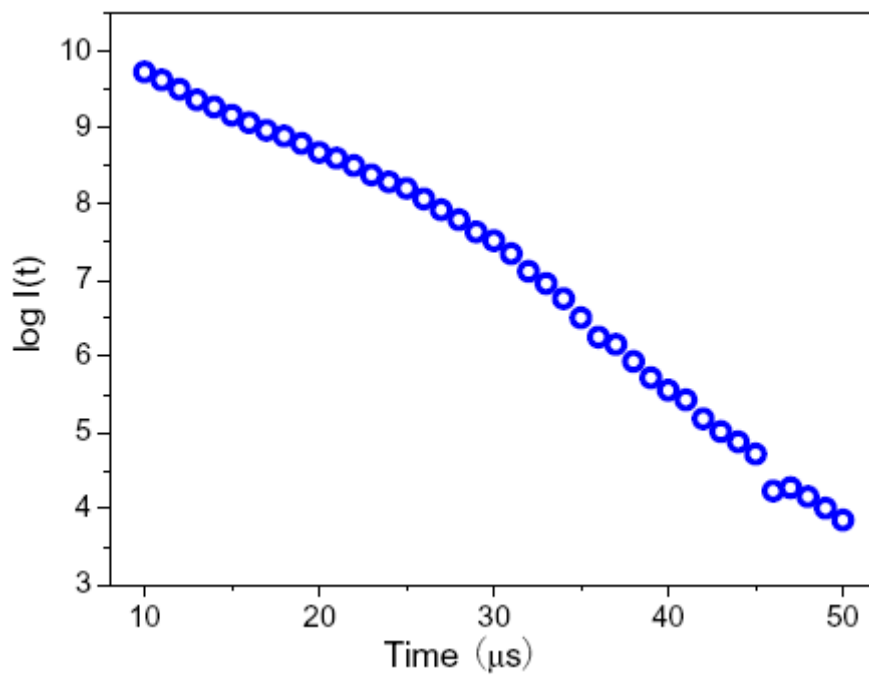

**Figure S7.** Semilogarithmic emission decay plots of the free H<sub>2</sub>DTDC ligand.

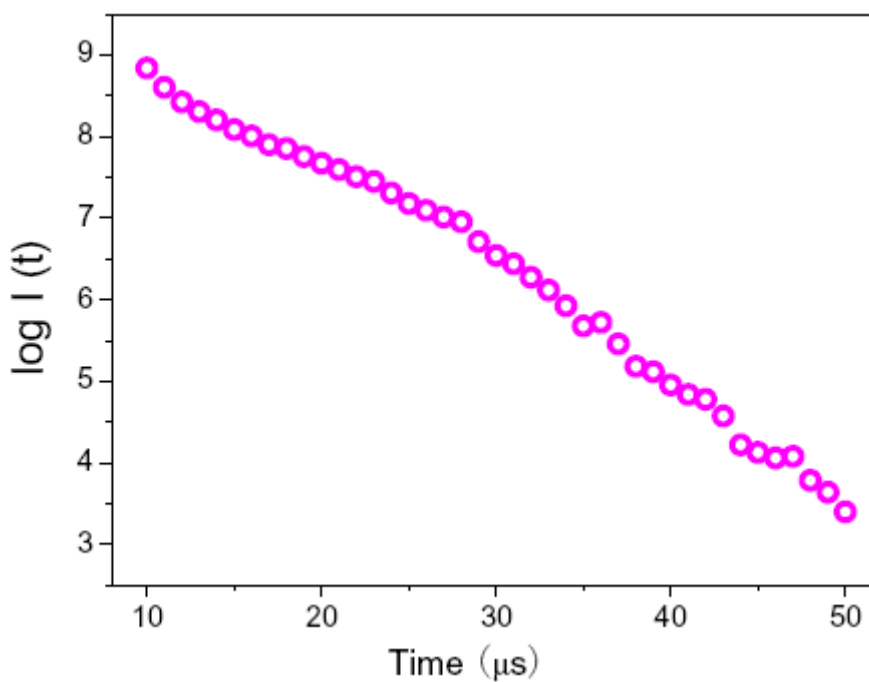

**Figure S8.** Semilogarithmic emission decay plots of compound 1.

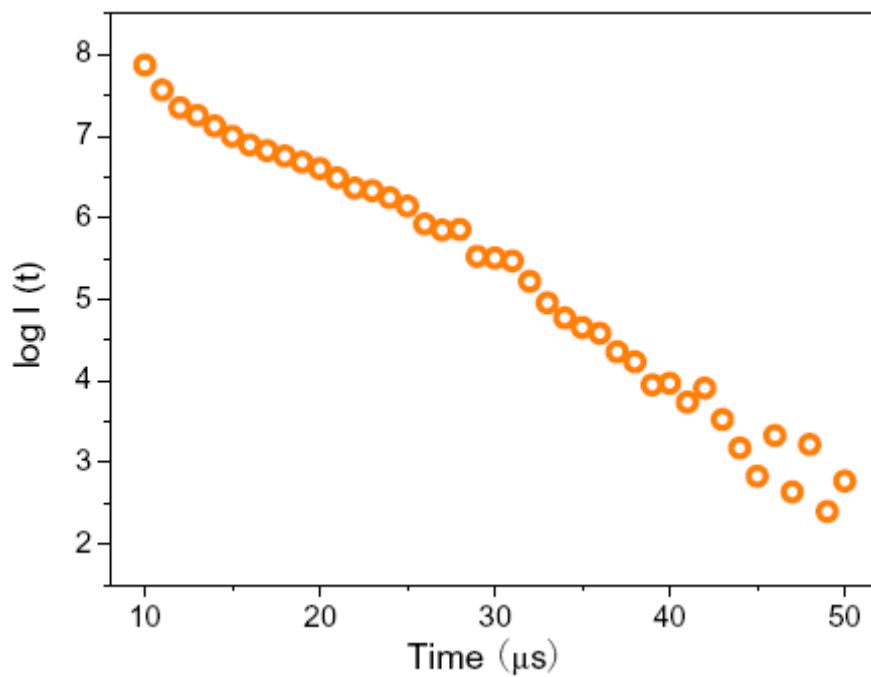

**Figure S9.** Semilogarithmic emission decay plots of compound 2.

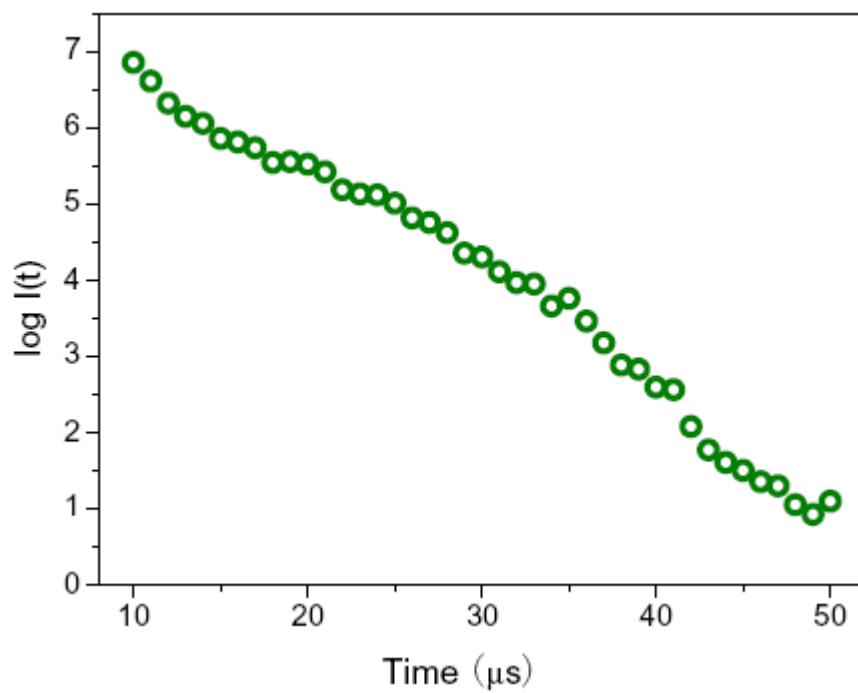

**Figure S10.** Semilogarithmic emission decay plots of compound 3.
